# Supplementary material for: Relationships between abiotic environment, plant functional traits, and animal body size at Mount Kilimanjaro, Tanzania
Source: PLOS journal article supplement (doi:10.1371/journal.pone.0174157), 2017-03-20
Supplement: S2 (10.1371/journal.pone.0174157.s002) [file journal.pone.0174157.s002.pdf]

## Relationships between abiotic environment, plant functional traits, and animal body size at Mount Kilimanjaro, Tanzania

Authors: David Schellenberger Costa\*, Alice Classen, Stefan Ferger, Maria Helbig-Bonitz, Marcell Peters, Katrin Böhning-Gaese, Ingolf Steffan-Dewenter, Michael Kleyer

\*Corresponding author: david.schellenberger.costa@uni-oldenburg.de

### S2\_Table. Pearson correlations between plant functional traits and leaf economics.

Leaf economics is the first axis of a PCA including specific leaf area (SLA), leaf dry matter content (LDMC), stem specific density (SSD), leaf nitrogen per unit mass (leaf  $N_{\text{mass}}$ ), and leaf phosphorus per unit mass (leaf  $P_{\text{mass}}$ ).

|                        | LDMC  | SSD   | Leaf $N_{\text{mass}}$ | Leaf $P_{\text{mass}}$ | Leaf economics |
|------------------------|-------|-------|------------------------|------------------------|----------------|
| SLA                    | -0.72 | -0.85 | 0.77                   | 0.73                   | 0.92           |
| LDMC                   |       | 0.82  | -0.91                  | -0.62                  | -0.92          |
| SSD                    |       |       | -0.76                  | -0.62                  | -0.92          |
| Leaf $N_{\text{mass}}$ |       |       |                        | 0.56                   | 0.91           |
| Leaf $P_{\text{mass}}$ |       |       |                        |                        | 0.78           |
